# Supplementary material for: Improved synthesis and crystal structure of the flexible pillared layer porous coordination polymer: Ni(1,2-bis(4-pyridyl)ethylene)[Ni(CN)4]
Source: Royal Society of Chemistry journal article supplement (doi:10.1039/c3ce00017f), 2013-01-01
Supplement: c3ce00017f.pdf [file c3ce00017f.pdf]

Table S1. Selected bond distances (in Å) in Ni (1,2-bis(4-pyridyl)ethylene)[Ni(CN)<sub>4</sub>] · ½L.  
 DMSO · 2H<sub>2</sub>O

| Atoms           | Distances | Atoms   | Distances  | Atoms                        | Distances | Atoms     | Distances |
|-----------------|-----------|---------|------------|------------------------------|-----------|-----------|-----------|
| Main Components |           |         |            | Disordered ligand components |           |           |           |
| Ni1-N1          | 2.060(2)  | Ni2-N2  | 2.055(2)   | Ni1-Ni1A                     | 2.118(7)  |           |           |
| Ni1-N4          | 2.066(2)  | Ni2-N3  | 2.063(2)   |                              |           |           |           |
| Ni1-N11         | 2.099(2)  | Ni2-N21 | 2.1070(13) |                              |           |           |           |
| Ni3-C1          | 1.856(2)  | Ni4-C2  | 1.859(2)   |                              |           |           |           |
| Ni3-C3          | 1.865(2)  | Ni4-C4  | 1.860(2)   |                              |           |           |           |
| C1-N1           | 1.150(3)  | C2-N2   | 1.154(3)   |                              |           |           |           |
| C3-N3           | 1.151(3)  | C4-N4   | 1.158(3)   |                              |           |           |           |
| N11-C11         | 1.342(3)  | N21-C21 | 1.339(2)   | N11A-C11A                    | 1.337(6)  |           |           |
| N11-C15         | 1.343(3)  | N21-C25 | 1.339(2)   | N11A-C15A                    | 1.337(6)  |           |           |
| C11-C12         | 1.382(3)  | C21-C22 | 1.380(2)   | C11A-C12A                    | 1.387(6)  |           |           |
| C12-C13         | 1.389(4)  | C22-C23 | 1.392(3)   | C12A-C13A                    | 1.388(6)  |           |           |
| C13-C14         | 1.389(4)  | C23-C24 | 1.395(3)   | C13A-C14A                    | 1.385(6)  |           |           |
| C14-C15         | 1.381(3)  | C24-C25 | 1.382(2)   | C13A-C16A                    | 1.483(6)  |           |           |
| C16-C16         | 1.297(6)  | C26-C26 | 1.319(5)   | C14A-C15A                    | 1.394(6)  |           |           |
|                 |           | C23-C26 | 1.474(2)   | C16A-C16A                    | 1.325(14) |           |           |
| N31-C31         | 1.342(6)  | N41-C41 | 1.337(5)   | N31A-C31A                    | 1.337(6)  | N41A-C41A | 1.339(6)  |
| N31-C35         | 1.327(6)  | N41-C45 | 1.343(6)   | N31A-C35A                    | 1.335(6)  | N41A-C45A | 1.323(6)  |
| C31-C32         | 1.394(6)  | C41-C42 | 1.401(6)   | C31A-C32A                    | 1.385(6)  | C41A-C42A | 1.392(6)  |
| C32-C33         | 1.395(6)  | C42-C43 | 1.386(6)   | C32A-C33A                    | 1.391(6)  | C42A-C43A | 1.391(6)  |
| C33-C34         | 1.384(5)  | C43-C44 | 1.392(6)   | C33A-C34A                    | 1.396(6)  | C43A-C44A | 1.388(6)  |
| C33-C36         | 1.479(6)  | C43-C46 | 1.475(6)   | C34A-C35A                    | 1.396(6)  | C43A-C46A | 1.474(6)  |
| C34-C35         | 1.402(6)  | C44-C45 | 1.393(6)   | C36A-C46A                    | 1.290(9)  | C44A-C45A | 1.398(6)  |
| C36-C46         | 1.332(8)  |         |            |                              |           |           |           |
| Disordered DMSO |           |         |            |                              |           |           |           |
| S1-O1S          | 1.837(4)  | S2-O2S  | 1.858(4)   |                              |           |           |           |
| S1-C1S          | 1.827(4)  | S2-C3S  | 1.507(3)   |                              |           |           |           |
| S1-C2S          | 1.761(5)  | S2-C4S  | 1.734(5)   |                              |           |           |           |

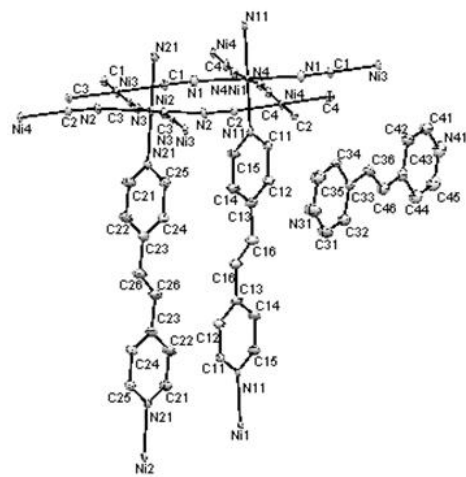

Fig S1. Labeling scheme for the Ni(bpene)[Ni(CN)<sub>4</sub>] molecule

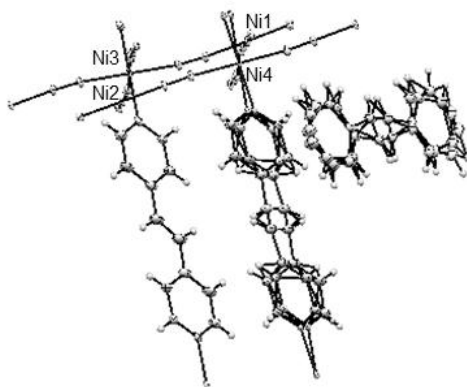

Fig S2. Partial structure of Ni(bpene)[Ni(CN)<sub>4</sub>] showing the overlapping disordered ligands ('Short bond appearance' is a result of short distances between disordered atoms).

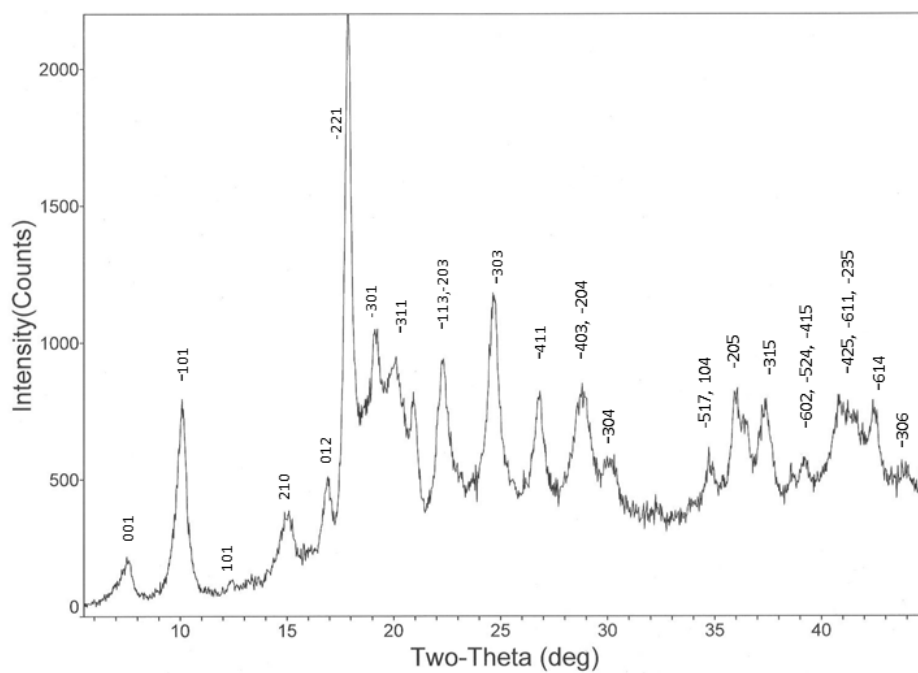

Fig S3. Powder X-ray diffraction pattern of Ni(bpene)[Ni(CN)<sub>4</sub>] and selected *hkl* indexes.
